# Supplementary material
Source: publisher figshare collection journal article supplement (https://aacr.figshare.com/articles/dataset/_/22430068)
Supplement: Supplementary file 1 [file 39876400]

1 **Supplementary materials information:**

2 1. Supplementary Materials and Methods

3 2. Supplementary Figures

4 3. Supplementary References

5

6 **1. Supplementary Materials and Methods**

7 **Cell line and reagents**

8 The HER2-positive mammary tumor cell line MI6 was established from the spontaneous primary  
9 mammary carcinomas of a transgenic FVB-Δ16HER2 mouse (1). The cells were maintained in  
10 complete culture medium (MammoCult™; Stemcell Technologies, cat no. 05620, Vancouver,  
11 Canada) supplemented with 1% fetal bovine serum (FBS; Gibco, Thermo Fisher Scientific, Waltham,  
12 MA, USA), penicillin 1 μg/ml, streptomycin 1 μg/ml (Sigma-Aldrich), hydrocortisone 0.48 μg/ml  
13 (Stemcell Technologies, cat no. 07925), and heparin 2 U/ml and cultured at 37°C in a 5% CO<sub>2</sub>  
14 atmosphere incubator. Mycoplasma testing was conducted using MycoAlert™ PLUS Mycoplasma  
15 Detection Kit (Lonza, cat no. LT07-703, Basel, Switzerland). The cells were used up to 6 passages  
16 after thawing and for no longer than 2 months.

17 Vancomycin hydrochloride (vancomycin; Cayman Chemical, cat no. 15327, MI, USA) and  
18 streptomycin sulfate salt (streptomycin; Sigma-Aldrich, cat no. S6501) were dissolved in the drinking  
19 water at a concentration of 200 mg/L. The antibiotic cocktail (ABX) was prepared using  
20 metronidazole (cat no. M3761), ampicillin sodium salt (cat no. A9518), and neomycin sulfate (cat no.  
21 1458009) (Sigma-Aldrich) at a concentration of 1 g/L and vancomycin 500 mg/L dissolved in the  
22 drinking water. The ABX was administered to mice *ad libitum* starting at four weeks of age and  
23 changed every 48-72 hours with fresh solution.

24 **Transgenic model of spontaneous tumorigenesis**

25 A breeding colony of FVB  $\Delta$ 16HER2 transgenic mice [FVB/NHsd-Tg( $\Delta$ 16HER2-LUC)6157Acam]  
26 was generated as described (2) and bred in the Animal Facility of Fondazione IRCCS Istituto  
27 Nazionale dei Tumori. Ear biopsies were harvested from four-week-old mice for routine genotyping.  
28 DNA was extracted using the Exgene Tissue DNA mini kit (GeneAll, Seoul, Korea) and analyzed by  
29 PCR (primers: F, 5'-GGCTCAGTGACCTGTTTTGG-3' and R, 5'-  
30 TGATGAGGATCCCAAAGACC-3'), with an expected amplicon length of 231 bp. The positive  
31 female mice were randomized into two groups, and one group was administered vancomycin (200  
32 mg/L) in the drinking water for the entire duration of the experiment. The mice were inspected  
33 weekly by palpation and, when the first tumor lesions reached a palpable volume, 8 mg/kg of  
34 trastuzumab, or saline (NaCl 0.9%), were administered i.p. once per week for 6 weeks. The anti-  
35 HER2 treatment efficacy was assessed by measuring the volume of the first tumor appeared.

36 **Quantification of bacterial load by flow cytometry and qRT-PCR**

37 The total bacterial load and the viability of fecal samples used for FMT were evaluated by flow  
38 cytometry. The fecal suspensions were double-stained with 1X SYBR green (Sigma-Aldrich, cat no.  
39 S9430) and propidium iodide (PI) 0.5  $\mu$ g/ml (Sigma-Aldrich, cat no. 79214) at 37°C for 15 minutes in  
40 the dark to distinguish live, injured and dead cells based on fluorescence. The concentration and  
41 viability of the cells was determined by using an Accuri C6 flow cytometer (BD Biosciences, Franklin  
42 Lakes, NJ, USA).

43 The bacterial DNA extracted from stool samples of antibiotic treated mice. The total 16S rRNA was  
44 quantified by using the SYBR<sup>TM</sup> Green Master Mix (Applied Biosystem, Thermo Fisher Scientific, cat  
45 no. 4385612). *U16S-Forward*: 5'-ACTCCTACGGGAGGCAGCAGT-3'; *U16S-Reverse*: 5'-  
46 ATTACCGCGGCTGCTGGC-3'.

47

#### 48 **Analysis of HER2 expression by western blot and immunohistochemistry**

49 To assess HER2 protein expression tumors were homogenized in radio-immunoprecipitation assay  
50 (RIPA) protein lysis buffer containing protease inhibitors. Protein concentrations were determined  
51 using Bio-Rad Protein Assay Dye (Bio-Rad, cat no. 5000006, Hercules, CA, USA) and 30 µg of  
52 protein were resolved on 4-12% precast NuPage Bis-Tris gels (Thermo Fisher Scientific, cat no.  
53 NP0326BOX, Waltham, MA, USA) in reducing conditions. Acquired images were analyzed using  
54 Quantity One software (RRID:SCR\_014280). The following antibodies were used: mouse monoclonal  
55 antibodies anti-HER2, clone Ab3 (Calbiochem, OP15L - RRID:AB\_2099415); Phospho-HER2/ErbB2  
56 (Tyr1248)/EGFR (Tyr1173) (Cell Signalling, 2244 - RRID:AB\_331705); anti-vinculin, clone hVIN-1  
57 (Sigma-Aldrich, V9131 - RRID:AB\_477629).

58 The HER2 expression was analyzed in FFPE tumors, four-micrometer tumor slides were  
59 deparaffinized, serially rehydrated, subjected to antigen retrieval at 96°C for 6 min using 10 mM citrate  
60 buffer, pH 6.0, and stained with the primary antibody anti-p185 used in the HercepTest (1:150, Dako,  
61 Agilent, cat no. A0485, Santa Clara, CA, USA - RRID:AB\_2335701). Quantification was performed  
62 using the publicly available ImageJ software (RRID:SCR\_003070) for image processing and reported  
63 is the percentage of stained area (n=2 tumors/group of treatment).

#### 64 **Analysis of trastuzumab distribution**

65 Trastuzumab detection within the tumor microenvironment was performed by immunofluorescence.  
66 The tumor samples were embedded in O.C.T. compound (Agar Scientific Ltd. cat no. AGR1180,  
67 Stansted, UK) and conserved at -80°C. Tissue specimens were cut on a cryostat microtome, and the  
68 cryostat sections were fixed with 4% paraformaldehyde for 20 minutes at room temperature. The tumor  
69 sections were then incubated with a blocking solution containing 3% BSA before staining with anti-  
70 human Alexa Flour®568 secondary antibodies (Thermo Fisher Scientific, cat no. A-21090;  
71 RRID:AB\_2535746) at a concentration of 1:100 for 1 hour at room temperature. The nuclei were

72 counterstained with DAPI (Thermo Fisher Scientific, cat no. D1306). Sample imaging was performed  
73 in the microscopy facility of the Fondazione IRCCS Istituto Nazionale dei Tumori using a Leica TCS  
74 SP8 X confocal laser scanning microscope (Leica Microsystems GmbH, Mannheim, Germany). The  
75 fluorochrome was excited by a pulsed super continuum white light laser (470-670 nm; 1 nm tuning step  
76 size). In particular, Alexa Flour®568 was excited by selecting a 557 nm laser line and detected from  
77 562 to 642 nm, and DAPI was excited with a 405 nm diode laser and detected from 422 nm to 488 nm.  
78 Three images were acquired for each sample in the 512x512 scan format using an HC PL APO 40X/1.3  
79 CS2 oil immersion objective and a pinhole set to 1 airy unit. The data were analyzed using the publicly  
80 available ImageJ software for image processing.

### 81 **Microbial metabolic analyses**

82  
83 Short-chain fatty acids (SCFAs) were measured in fecal sample as previously described in (3).  
84 Samples were stored at  $-20^{\circ}\text{C}$  until analysis. Determination of SCFAs concentration was achieved  
85 through ultraperformance liquid chromatography-high resolution-mass spectrometry analysis (UPLC-  
86 HR-MS). UPLC-HR-MS analysis was carried out on an Acquity UPLC separation module (Waters,  
87 Milford, MA, USA) coupled with an Exactive Orbitrap MS with an HESI-II probe for electrospray  
88 ionization (Thermo Fisher Scientific).

### 89 **Gene expression analysis**

90 Gene expression profile was performed by the Genomic Facility of Fondazione IRCCS Istituto  
91 Nazionale dei Tumori, Milan. After RNA extraction quality check and quantification were performed  
92 by 4200 TapeStation (Agilent) and a Qubit fluorometer with the Qubit RNA HS assay kit (Thermo  
93 Fischer Scientific, cat no. Q32852), respectively, the RNA expression was assessed using the mouse or  
94 human Affymetrix Clariom S Pico assay (Thermo Fisher Scientific, cat no. 902930 and 902929),  
95 respectively. A total of 100 ng of total RNA was used to generate the single-stranded cDNA samples  
96 for hybridization. Then, cDNA was enzymatically fragmented and biotinylated using the WT Terminal

97 Labeling kit (Thermo Fisher Scientific, cat no. 901647), combined with hybridization buffer, and  
98 injected into human Clariom S arrays targeting >20,000 well-annotated genes. The arrays were stained  
99 using the Affymetrix® GeneChip® Fluidics Station 450 and scanned with the 7G Affymetrix®  
100 GeneChip® Scanner 3000. Raw data were processed using Transcriptome Analysis Console software  
101 (Thermo Fisher Scientific). CEL files containing feature intensity values were converted into  
102 summarized expression values by Robust Multiarray Average (RMA), which consists of background  
103 adjustment and quantile normalization across all chips. All samples passed QC thresholds for  
104 hybridization, labeling and the expression of housekeeping gene controls.

#### 105 **Immunohistochemical analysis and flow cytometry**

106 The characterization of the tumor immune infiltrate on FFPE samples was performed and analyzed in  
107 collaboration with the pathologists' group led by Dr. Tripodo at the Università di Palermo, Italy. The  
108 antigen unmasking was performed using Novocastra Epitope Retrieval Solutions (Novocastra, cat no.  
109 RE7119-CE, Newcastle upon Tyne, UK), pH 9, in a PT Link pretreatment module (Dako) at 98°C for  
110 30 min. The sections were warmed to room temperature and washed with PBS. After neutralization of  
111 the endogenous peroxidase with 3% H<sub>2</sub>O<sub>2</sub> and Fc blocking by a specific protein block, the slides were  
112 incubated overnight with the primary antibodies at 4°C. The following antibodies were used: rabbit  
113 polyclonal anti-mouse CD3 (1:100 pH 9, cat no. ab5690, Abcam, Cambridge, UK -  
114 RRID:AB\_305055); rat monoclonal anti-mouse CD4 (Clone 4SM95, 1:100 pH 9, cat no. 14-9766,  
115 eBIOSCIENCE, Thermo Fisher Scientific - RRID:AB\_2573007); rat monoclonal anti-mouse CD8a  
116 (Clone 4SM15, 1:100 pH 9, cat no. 14-0808, eBIOSCIENCE Thermo Fisher Scientific -  
117 RRID:AB\_2572860); rabbit polyclonal anti-mouse CD45 (1:1000 pH 9, cat no. ab10558, Abcam -  
118 RRID:AB\_442810); rabbit polyclonal anti-human Granzyme B (ready to use, pH 9, cat no. 760-4283,  
119 Ventana, cross reactive with mouse - RRID:AB\_2335967); rat monoclonal anti-mouse Gr-1 (Clone  
120 RB6-8C5, 1:50 pH9, cat no. MAB1037-100, R&D System - RRID:AB\_2232806); goat polyclonal anti-

121 mouse NKp46/NCR1 (1:50 pH6 cat no. AF2225, R&DSYSTEM - RRID:AB\_355192). Proteins' staining  
 122 were revealed by AEC (3-amino-9-ethylcarbazole) substrate-chromogen following the manufacturer's  
 123 instructions. The slides were counterstained with Harris hematoxylin (Novocastra, cat no. 3801560).  
 124 The valuation of tumor immune infiltrate was carried out by two independent pathologists who were  
 125 blinded to the treatment groups. All sections were analyzed under an AXIO Scope A1 optical  
 126 microscope (ZEISS, Jena, Germany), and 5 sections were counted at 40x magnification.  
 127 Microphotographs were collected through an Axiocam 503 Color digital camera (ZEISS) using Zen2  
 128 software.

129 For flow cytometry analysis, tumors and draining lymph nodes (dLN) were harvested at the end of the  
 130 experiment. The dLNs were digested in HBSS with 0.5 % FBS containing DNase I (100 µg/mL) and  
 131 Collagenase IV (200 U/mL) for 20 min and smashed through a cell strainer (40 µm pore diameter),  
 132 single cell suspensions were then used for flow cytometry staining. Tumors were cut into small pieces  
 133 and smashed through a cell strainer (40 µm pore diameter) Red blood cells lysis was performed by  
 134 incubating tumor cells with ACK (Gibo™, Thermo Fisher Scientific, cat no. A10492-01) on ice 5 min.  
 135 Single cell suspensions were then used for flow cytometry staining. Antibodies used for the analysis  
 136 through flow cytometry are listed in table S1 (Table S1). Stained samples were fixed 15 min at 4°C  
 137 with 1 % formalin and run on a BD FACSCelesta system (BD Biosciences) at the flow cytometry  
 138 facility of our Institute.

139 **Table S1. List of the antibodies used for flow cytometry**

| Molecule  | Conjugate | Clone    | Brand and Cat. no                         | Dilution |
|-----------|-----------|----------|-------------------------------------------|----------|
| Anti-CD45 | BV786     | 30-F11   | BD Horizon™ n. 564225;<br>RRID:AB_2716861 | 1:300    |
| Anti-CD3  | BB700     | 145-2C11 | BD Horizon™ n. 745836;<br>RRID:AB_2743282 | 1:50     |
| Anti-CD8  | BV605     | 53-6.7   | BD Horizon™ n. 563152;<br>RRID:AB_2738030 | 1:100    |

|            |                                |        |                                                                      |        |
|------------|--------------------------------|--------|----------------------------------------------------------------------|--------|
| Anti-CD4   | BV510/BB700                    | RM4-5  | BD Horizon™ n. 563106/566407;<br>RRID:AB 2687550;<br>RRID:AB 2744427 | 1:100  |
| Anti-CD49b | BV421                          | DX5    | BD Horizon™ n. 563063;<br>RRID:AB 2737983                            | 1:100  |
| Anti-NKp46 | PE-eFluor610                   | 29A1.4 | eBioscience n. 61-3351-82;<br>RRID:AB 2574606                        | 1:100  |
| Anti-CD69  | PE                             | H1.2F3 | BD Horizon™ n. 553237;<br>RRID:AB 394726                             | 1:100  |
| Anti-MHCII | FITC                           | 2G9    | BD Pharmingen n. 553623;<br>RRID:AB 394958                           | 1:1000 |
| Anti-CD11c | BV605                          | HL3    | BD Horizon™ n. 563057;<br>RRID:AB 2737978                            | 1:100  |
| Anti-CD19  | FITC                           | 1D3    | BD Pharmingen n. 553785;<br>RRID:AB 395049                           | 1:100  |
| Anti-CD86  | APC-R700                       | GL1    | BD Horizon™ n. 565479;<br>RRID:AB 2739258                            | 1:200  |
| L/D        | Fixable viability<br>Stain 780 |        | BD Horizon™ n. 565388                                                | 1:1000 |

140

141 **Quantification of plasma cytokines**

142 Blood samples were collected from mice 48 hours after trastuzumab treatment in heparine (20 µL,  
143 5000 U.I./mL). Sample were centrifuged at 1500 rpm for 5 min and then 3000 rpm for 10 min at 4° C.  
144 Plasma samples were stored at -80° C. Cytokines and chemokines detection was carried out using the  
145 ProCartaplex Immunoassay (Thermo Fisher Scientific, cat no. EPXR260-26088-901). Samples were  
146 processed according to manufacturer's instruction and read on a Bio-Plex® 200 Systems instrument  
147 (Bio-Rad, CA, USA).

148 **Collection of patients' fecal samples and fecal microbiota transplantation (FMT) experiment**

149 Fecal samples from patients were collected before the beginning of TH (taxanes and trastuzumab)  
150 treatment using the ANAEROGEN™ COMPACT system (Oxoid Microbiology Products, Thermo  
151 Fisher Scientific, cat no. AN0010C) to preserve anaerobic bacteria viability. Fecal samples for the 16S  
152 analysis were aliquoted and stored at -80°C. For the patient FMT experiments, the feces samples were  
153 frozen after being homogenized with autoclaved brain-heart-infusion media (BHI) (Sigma-Aldrich, cat

154 no. 1104930500) supplemented with 0.1% L-cysteine (Sigma-Aldrich, cat no. 30129) (2 g of feces in  
155 10 ml of medium) and 15% glycerol and stored immediately at -80°C.

156 FMT using fecal samples from BC patients was performed by thawing the fecal material and by  
157 transferring 200 µl of suspension via oral gavage into each recipient mouse. FMT was performed a  
158 total of 5 times. Two gavages were performed at 24 hours before and 48 hours after tumor cell injection  
159 and then every 10 days for an additional 3 times. Trastuzumab treatment started when the tumor  
160 reached a palpable volume as previously described, and the mAb was administered twice a week for 3  
161 weeks at a concentration of 5 mg/kg. Differences in tumor weights were evaluated by mixed effect  
162 linear model (implemented in the lme4 package of R) using treatment in mice as fixed effect and with  
163 random intercept.

164



165 2. Supplementary Figures

166 Supplementary Fig. S1

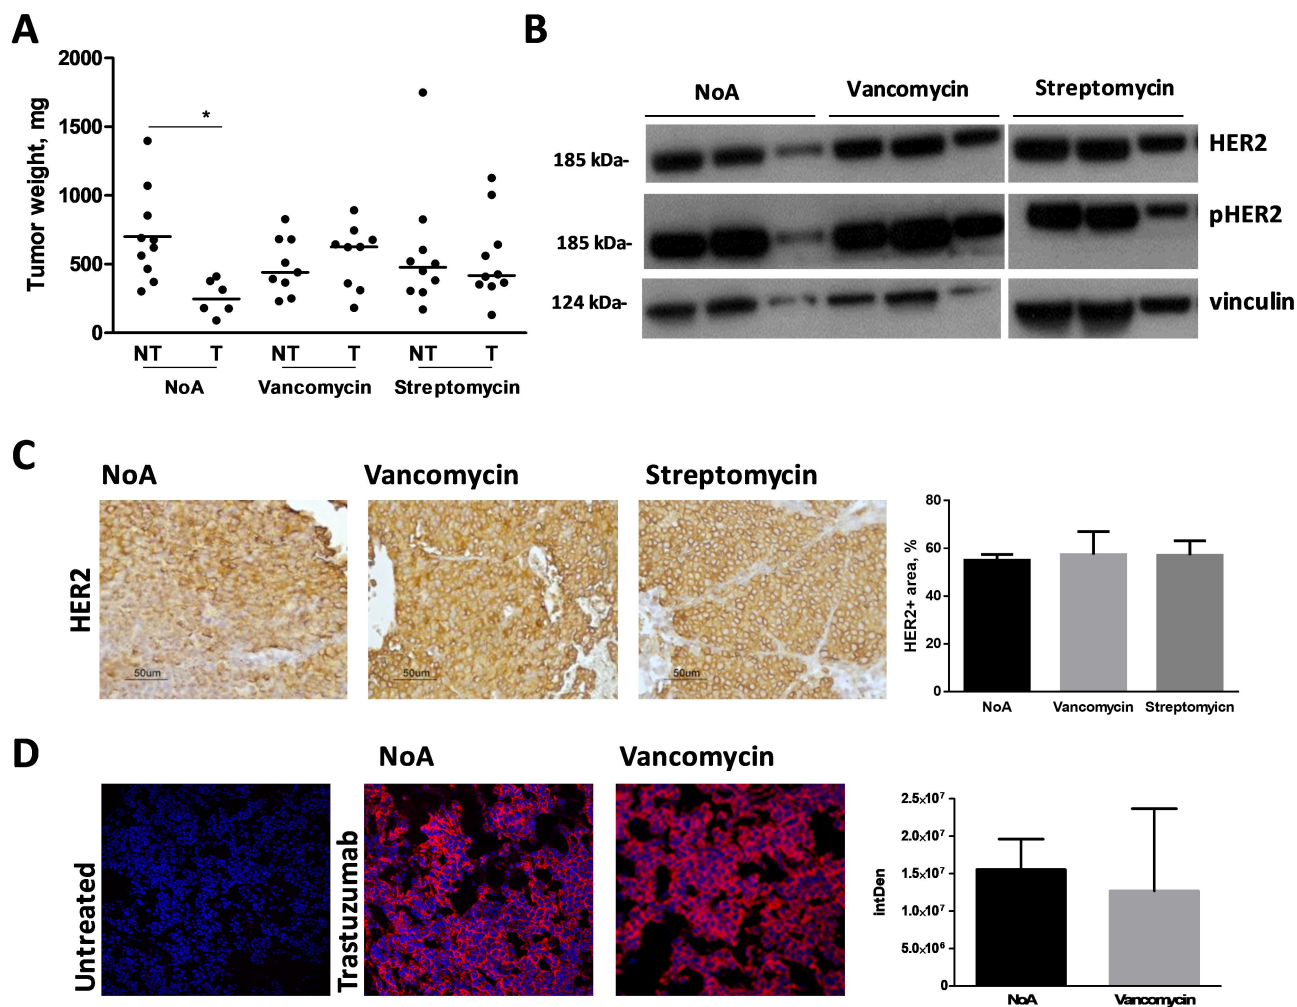

167

168 **Supplementary Fig. S1. Impact of antibiotic treatment on trastuzumab efficacy and the tumor**  
 169 **microenvironment.** **A)** MI6 tumor weight measurement in control mice (NoA) and vancomycin-, or  
 170 streptomycin (200 mg/L)-treated mice. MI6 tumors were treated or not (NT) with 5 mg/kg of  
 171 trastuzumab twice a week (T). **B-C)** HER2 expression and activation as analyzed by WB (B) and  
 172 HER2 staining as evaluated by IHC (C) in tumors derived from NoA- and antibiotic-treated animals.  
 173 HER2 quantification was evaluated by ImageJ as the number of brown pixels. Scale bars: 50  $\mu$ m. **D)**  
 174 Trastuzumab diffusion within the tumor was evaluated by immunofluorescence using an anti-human  
 175 IgG antibody. The IntDen is the number of red pixels as evaluated by ImageJ software in 3 images per  
 176 group at 40x magnification. Blue: DAPI (data shown as the mean+SD). \*  $p < 0.05$  by Student's t-test.

177

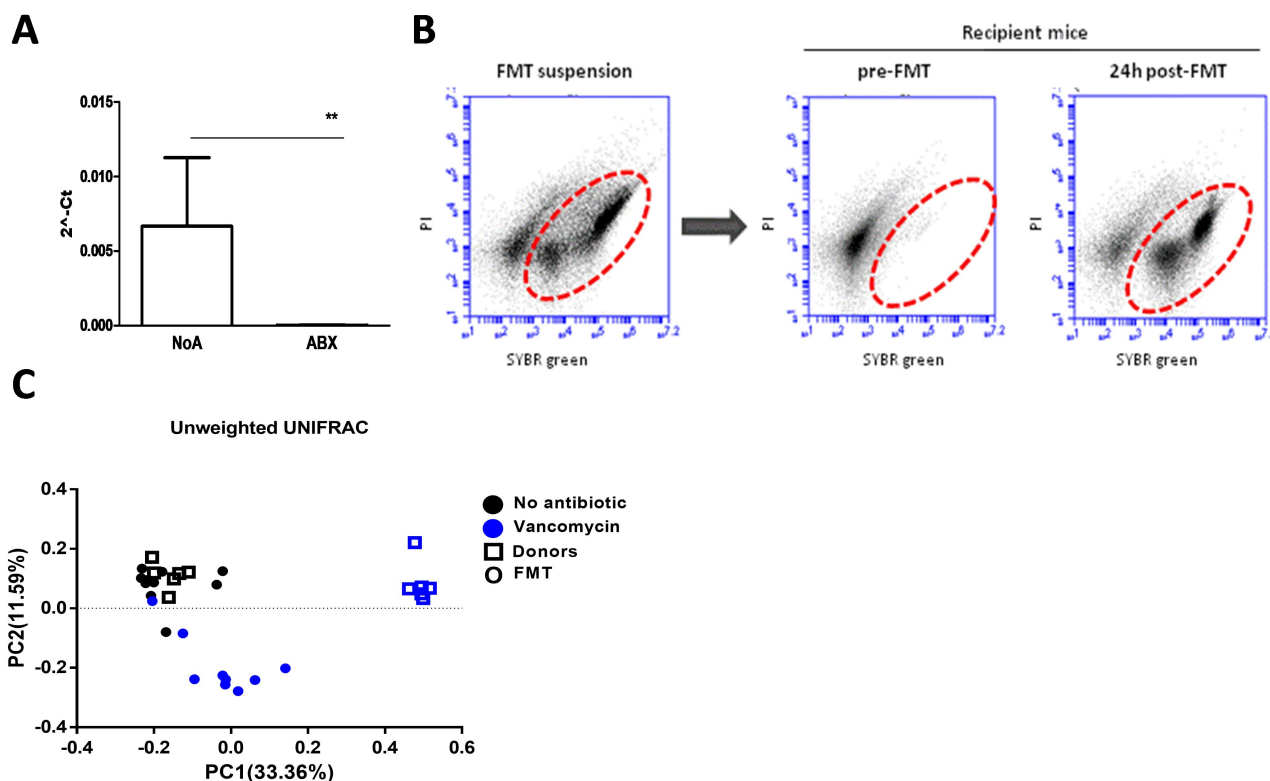

179

180 **Supplementary Fig. S2. Depletion of commensal microbiota by antibiotic cocktail (ABX)**  
 181 **treatment and fecal microbiota transplantation.** Four-week-old FVB mice were treated with a  
 182 cocktail of broad-spectrum antibiotics (metronidazole, ampicillin, neomycin 1 g/L, vancomycin 500  
 183 mg/L) administered in the drinking water for 28 days to deplete the mouse intestinal flora. The gut  
 184 microbiota was then reconstituted by fecal microbiota transplantation (FMT) using stool suspensions  
 185 from donor mice treated or not treated with vancomycin or streptomycin. **A)** Bacterial load  
 186 quantification by qRT-PCR using universal primers for the 16S rRNA gene. DNA was extracted from  
 187 one stool pellet per mouse. **B)** Flow cytometry analysis of the bacterial suspension: viability of the  
 188 bacterial suspension from donor mice used for FMT (FMT suspension), in recipient mice before FMT  
 189 (pre-FMT) and 24 h after FMT with stool suspension (24 h post-FMT). **C)** Principal coordinate  
 190 analysis plot of microbial  $\beta$ -diversity between FMT-NoA (black) and FMT-vancomycin (blue) animals  
 191 generated using unweighted UniFrac distance matrices using feces collected at the end of the  
 192 experiment. The data from FMT mouse (●) and donor mouse (□) fecal samples are shown. \*\*  $p < 0.01$   
 193 by Student's t-test.

194

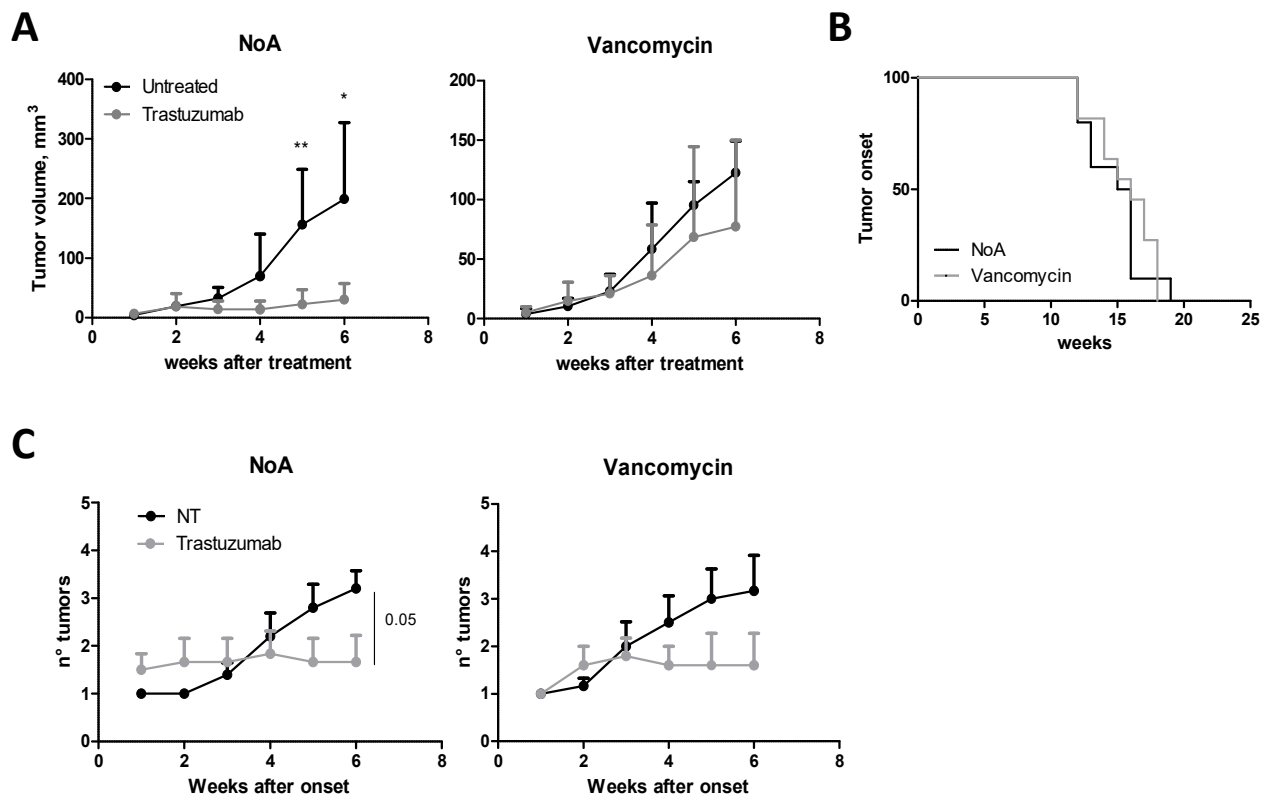

196

197 **Supplementary Fig. S3. Impact of vancomycin on trastuzumab efficacy in  $\Delta$ 16HER2 transgenic**  
 198 **FVB mice.** Female  $\Delta$ 16HER2 transgenic FVB mice were treated or not treated with vancomycin (200  
 199 mg/L) starting at 4 weeks of age. After onset of the first tumor, the mice were treated with 8 mg/kg  
 200 trastuzumab once a week for 6 weeks. **A)** Antitumor activity of trastuzumab. The tumor volume of the  
 201 first tumor is shown. **B)** Tumor onset. **C)** Tumor multiplicity. Data are shown as the mean+SD (n=5-6  
 202 mice per group of treatment). \*  $p < 0.05$  and \*\* $p < 0.01$  by an unpaired Student's t-test.

203

204

205 **Supplementary Fig. S4**

206

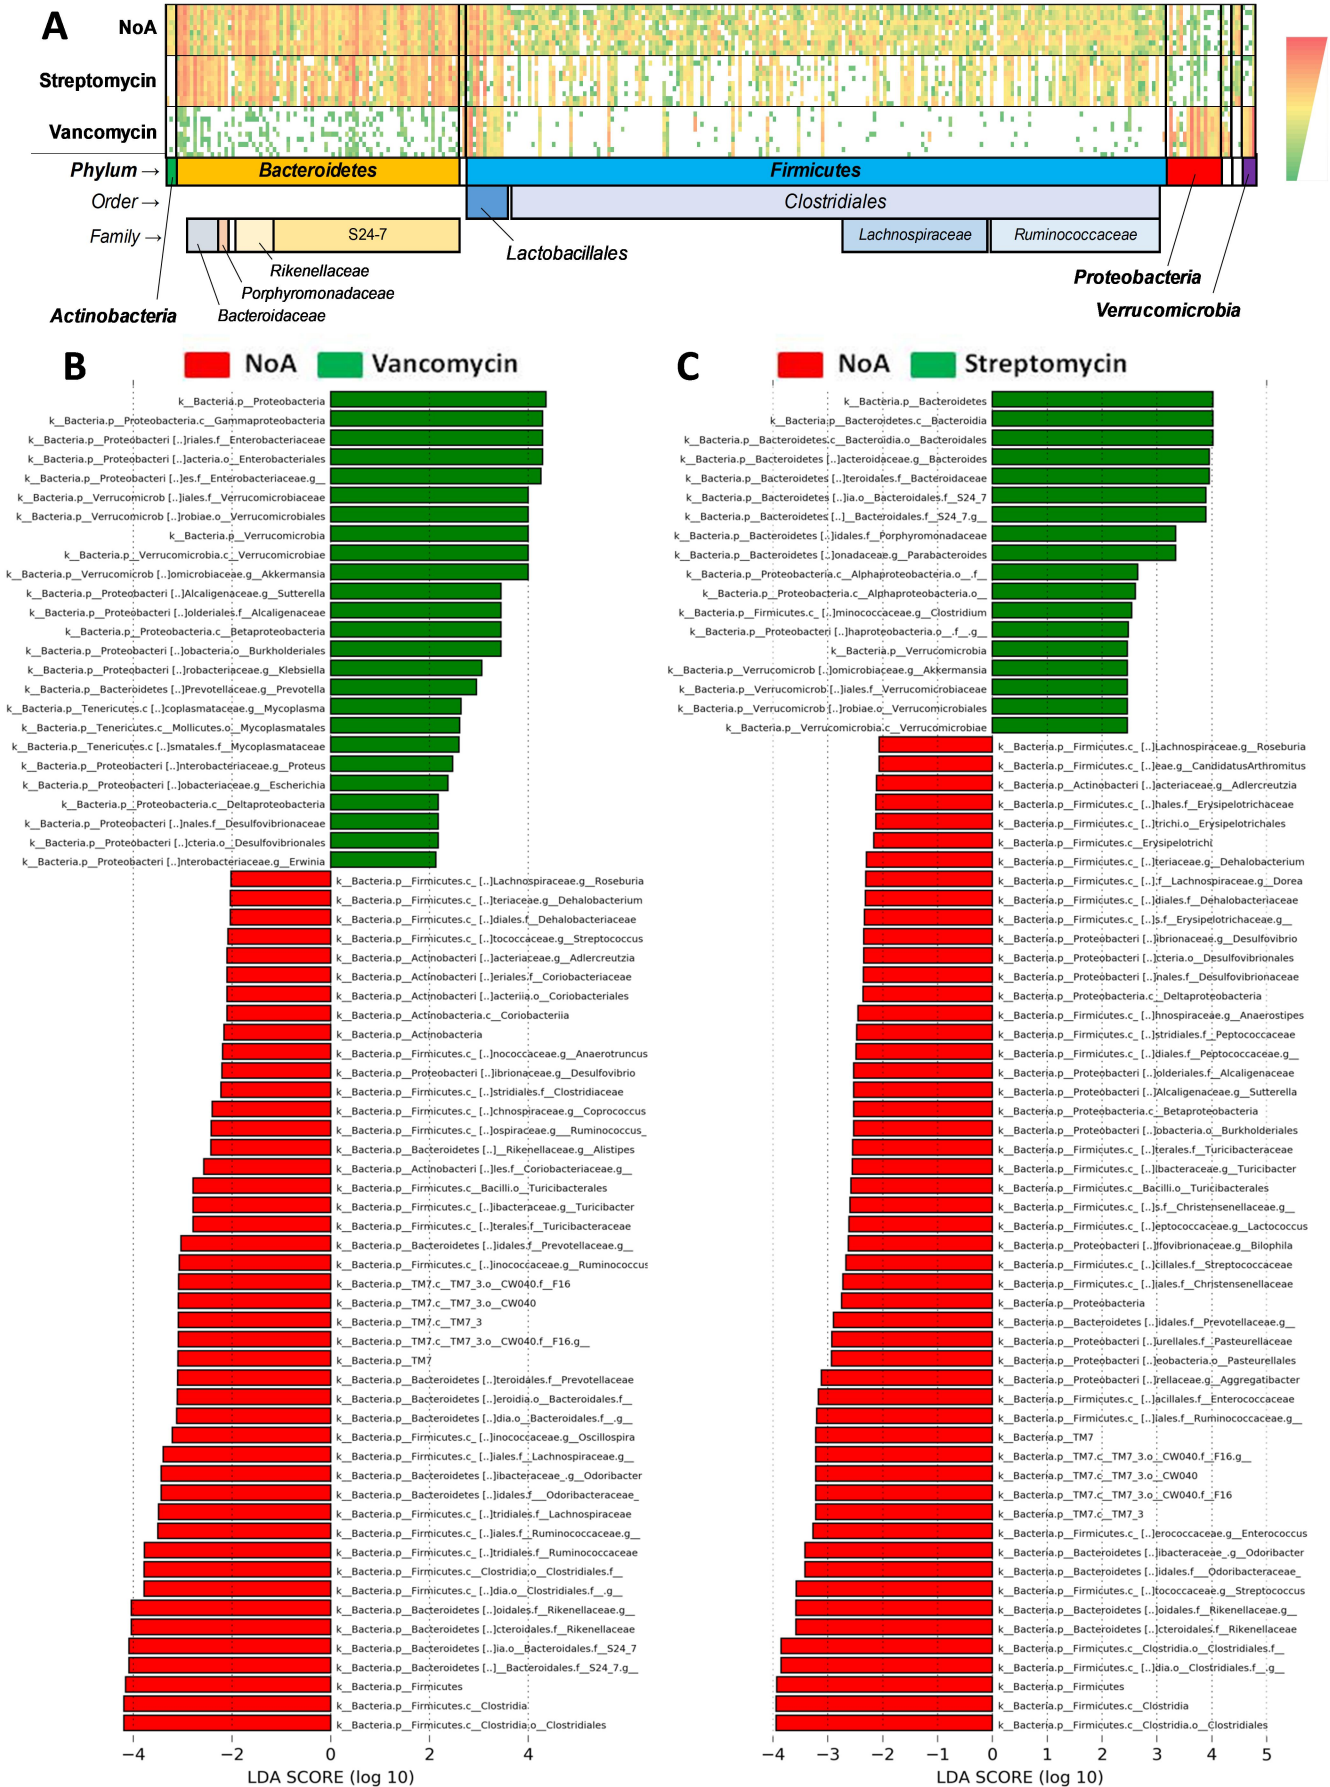

207 **Supplementary Fig. S4. Differentially abundant bacteria in the gut microbiota of antibiotic-**  
208 **treated mice.** A) Heatmap of bacterial taxa relative abundance for the three treatment groups.  
209 Minimum to maximum relative abundances are indicated as green-yellow-red; white, not detected. **B-**  
210 **C)** Linear discriminant analysis (LDA) scores computed for differentially abundant taxa in the fecal  
211 microbiomes of NoA (red) and vancomycin- or streptomycin (green)-treated mice.

212

213

214 **Supplementary Fig. S5**

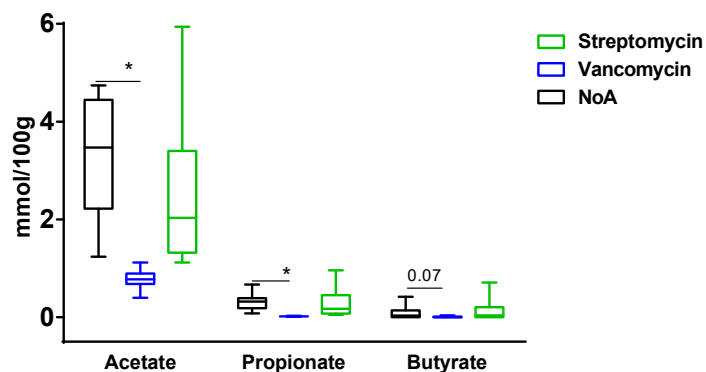

215

216 **Supplementary Fig. S5. Short-chain fatty acids (SCFAs) quantification in fecal samples from**  
217 **antibiotic-treated mice.** The analysis was performed by ultraperformance liquid chromatography-  
218 high-resolution-mass spectrometry (UPLC-HR-MS). \* $p < 0.05$  by an unpaired Student's t-test.

219

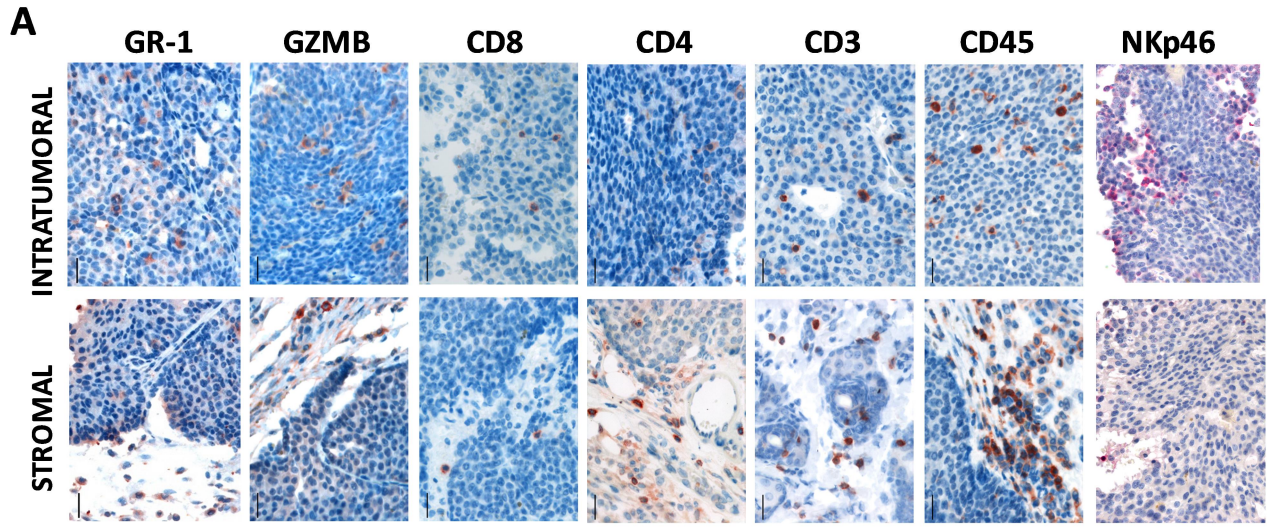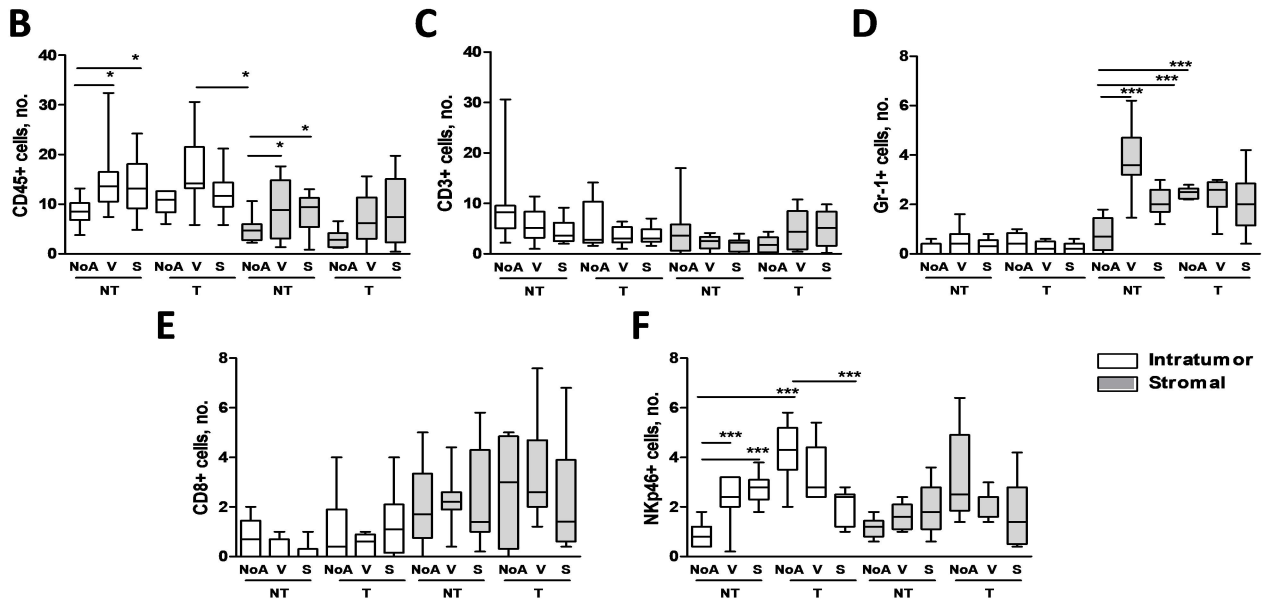

221

222 **Supplementary Fig. S6. Analysis of intratumor and stromal cell staining in tumors of antibiotic-**  
 223 **treated mice. A)** Representative images of intratumor and stromal staining of tumor immune infiltrate.  
 224 **B-E)** Counts of intratumor (white) and stromal (gray) CD45+ cells (B), CD3 lymphocytes (C), Gr1+  
 225 cells (D), CD8+ T cells (E) and NKp46+ cells (F). Control (NoA), vancomycin (V)- or streptomycin  
 226 (S)-treated mice treated with trastuzumab (T) or untreated (NT). Cells were counted in 5 sections at an  
 227 original magnification of 40x. Scale bars: 50  $\mu$ m (data shown as box-and-whiskers, min to max). \*  
 228  $p < 0.05$  and \*\*\* $p < 0.001$  by an unpaired Student's t-test.

**A**

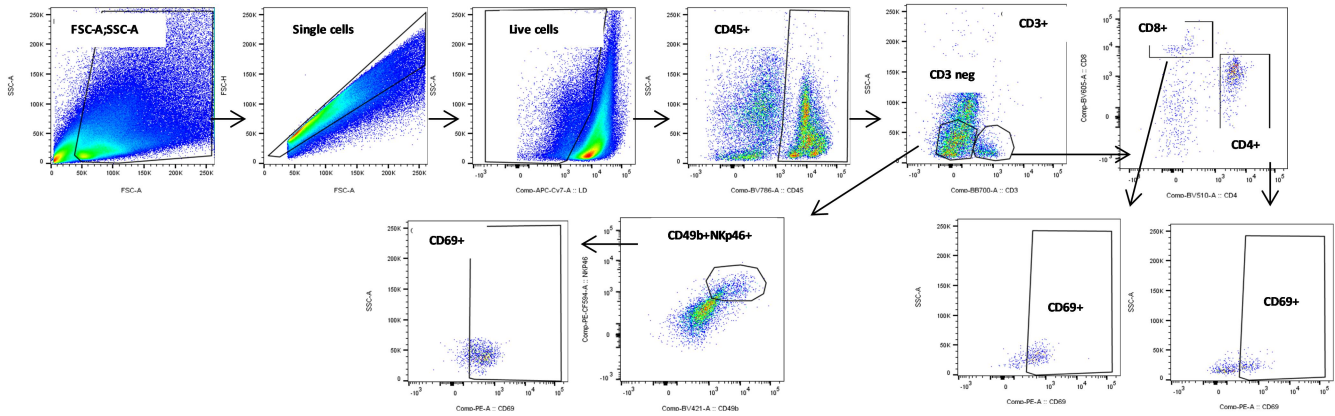

**B**

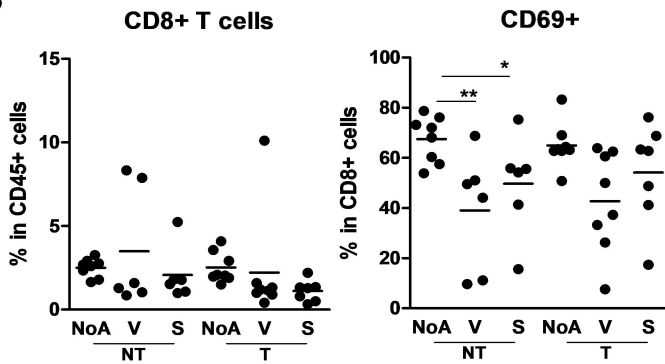

230

231 **Supplementary Fig. S7. Impact of antibiotic treatment on tumor immune infiltrate.** Tumor  
 232 samples collected at the end of the experiment were homogenized and characterized for immune  
 233 infiltrates by flow cytometry. **A)** Population gating strategy. **B)** Frequencies of CD8+ T cell (CD3+;  
 234 CD8+) (left) and activated (CD69+) CD8+ T cell (right) immune populations found in tumors grown in  
 235 control (NoA), vancomycin (V) or streptomycin (S) mice treated with trastuzumab (T) or untreated  
 236 (NT). \*  $p < 0.05$  and \*\*  $p < 0.01$  by an unpaired Student's t-test.

237



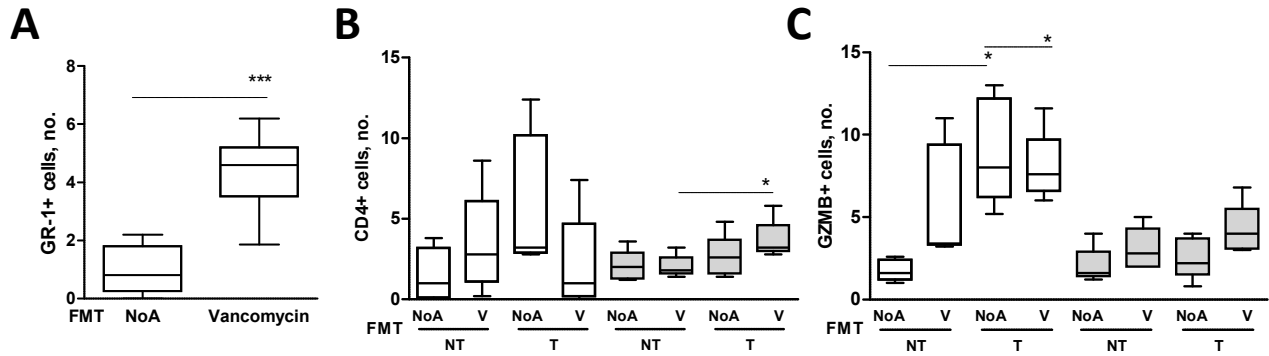

239 **Supplementary Fig. S8. Analysis of intratumor and stromal cell staining in tumors from FMT**  
 240 **mice. A-C)** Count of total Gr-1+ cells (A) and intratumor (white) and stromal (gray) staining of CD4+  
 241 T cells (B) and GZMB-positive cells (C) in the tumor microenvironment of FMT mice. Control (FMT-  
 242 NoA), vancomycin (FMT-V) mice treated with trastuzumab (T) or untreated (NT). Cells were counted  
 243 in 5 sections at an original magnification of 40x. Scale bars: 50  $\mu$ m (data shown as box-and-whiskers,  
 244 min to max). \*  $p < 0.05$  and \*\*\* $p < 0.001$  by an unpaired Student's t-test.

245

246

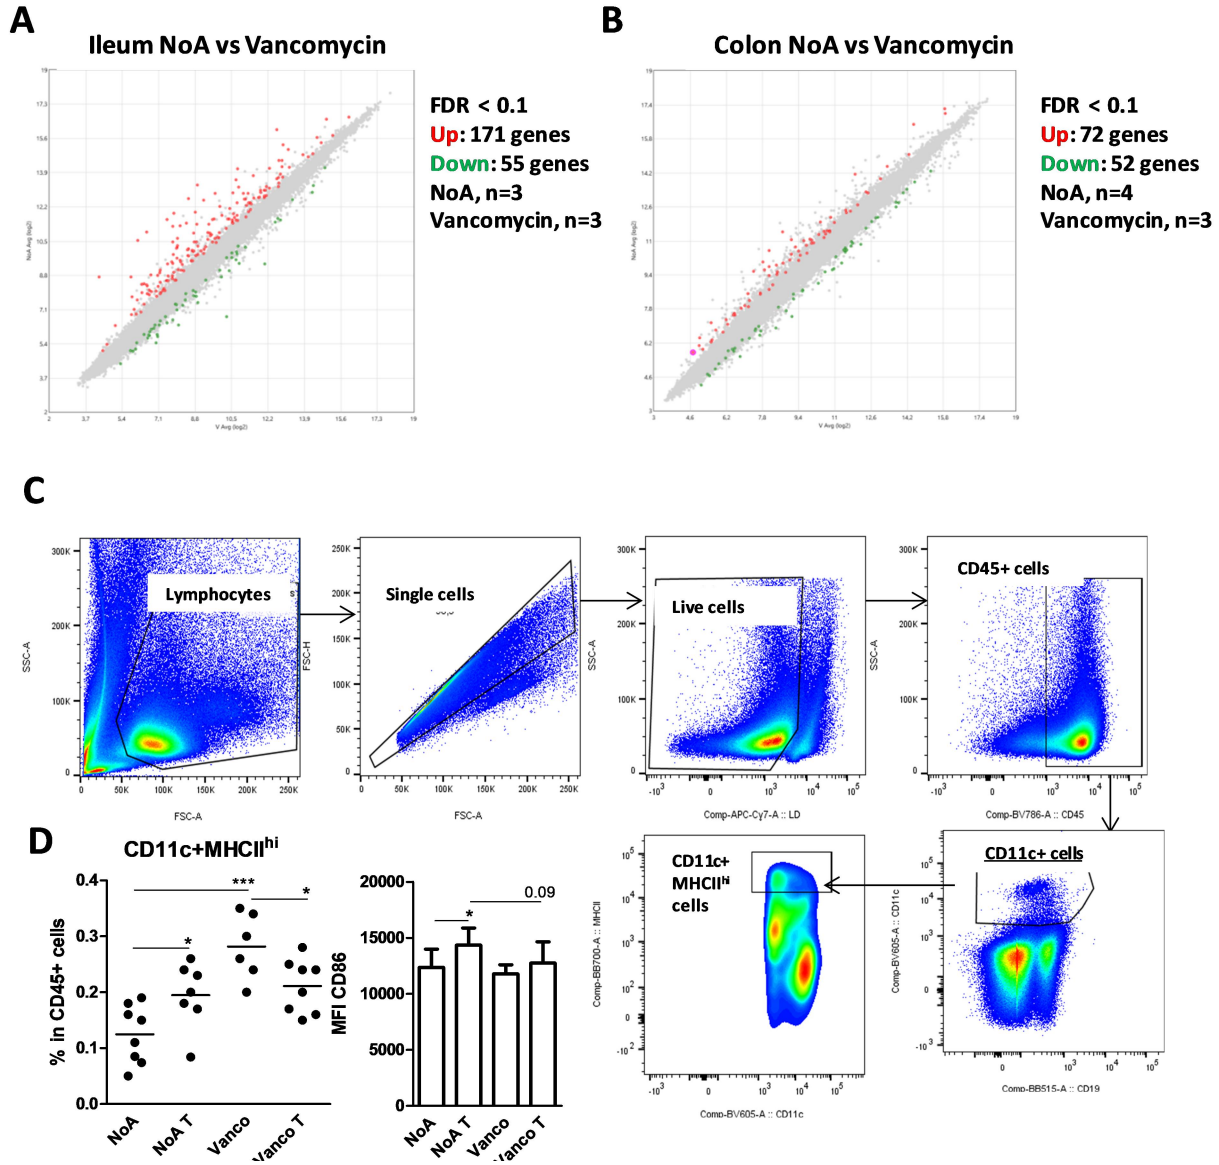

248

249 **Supplementary Fig. S9. Impact of vancomycin treatment on intestinal and systemic immune**  
 250 **features. A-B)** Scatter plot of differentially expressed genes (DEGs) (FDR <0.1) in the ileum (A) and  
 251 colon (B) of mice. Red, DEGs increased in NoA mice; green, DEGs increased in mice under  
 252 vancomycin treatment. **C-D)** Flow cytometry analysis of tumor-draining lymph nodes in NoA- and  
 253 vancomycin-treated mice. Population gating strategy (C). Frequency and activation (CD86 MFI) of  
 254 CD11c<sup>+</sup>MHCII<sup>hi</sup> DCs in control (NoA) and vancomycin (Vanco)-treated mice treated with trastuzumab  
 255 (T) or untreated (NT). \* p<0.05 and \*\*\*p<0.001 by an unpaired Student's t-test.

256

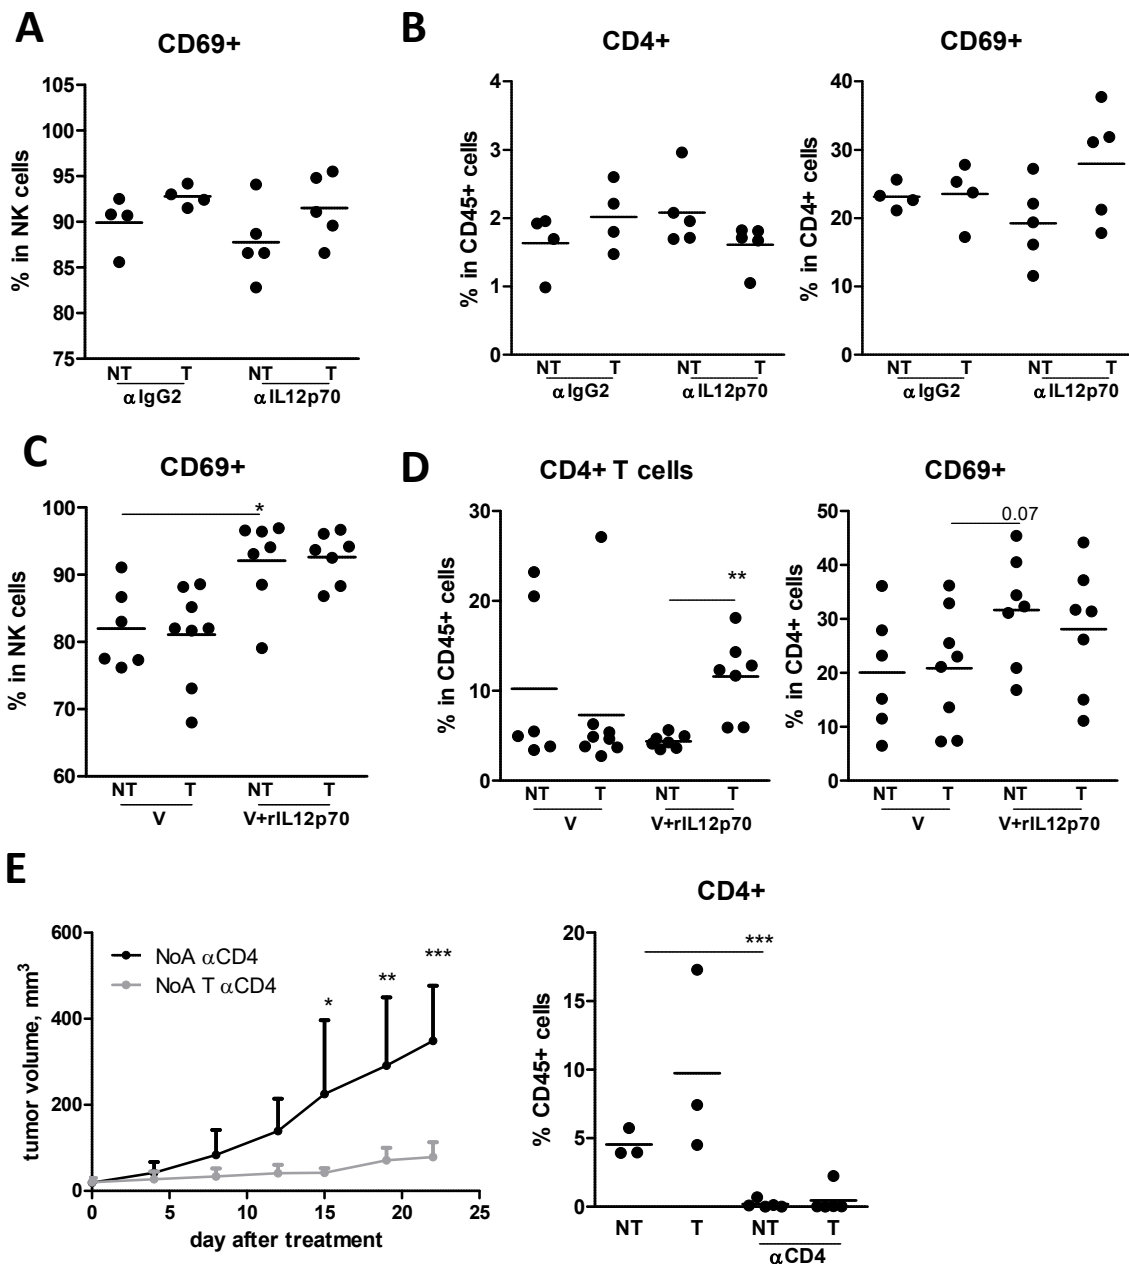

258

259 **Supplementary Fig. S10. Impact of IL12p70 and CD4+ cell depletion on trastuzumab antitumor**  
 260 **efficacy and on tumor immune infiltrate. A-B)** Tumor samples collected at the end of the experiment  
 261 were homogenized and characterized for immune infiltrates by flow cytometry. NK cell activation  
 262 status (CD69+) (A); frequencies of CD4+ T cells (CD3+;CD4+) (left) and activation status (right) (B)  
 263 in NoA mice treated with anti-IL12p70 mAb (1 mg before trastuzumab injection, then 500  $\mu$ g i.p. twice  
 264 a week). **C-D)** NK cell activation status (CD69+) (C); frequencies of CD4+ T cells (CD3+;CD4+) (left)  
 265 and activation status (right) (D) in mice under the vancomycin regimen (200 mg/L) and treatment or no

266 treatment with recombinant IL12p70 (rIL12p70) (500 ng i.p. three times a week). **E**) Trastuzumab (T)  
267 antitumor activity in NoA mice depleted of CD4<sup>+</sup> T cells ( $\alpha$ CD4) by an anti-CD4 mAb (400  $\mu$ g i.p.  
268 twice a week) (right) and frequencies of intratumor CD4<sup>+</sup> T cells analyzed by flow cytometry.  
269 \*p<0.05; \*\* p<0.01 and \*\*\*p<0.001 by an unpaired Student's t-test.

270

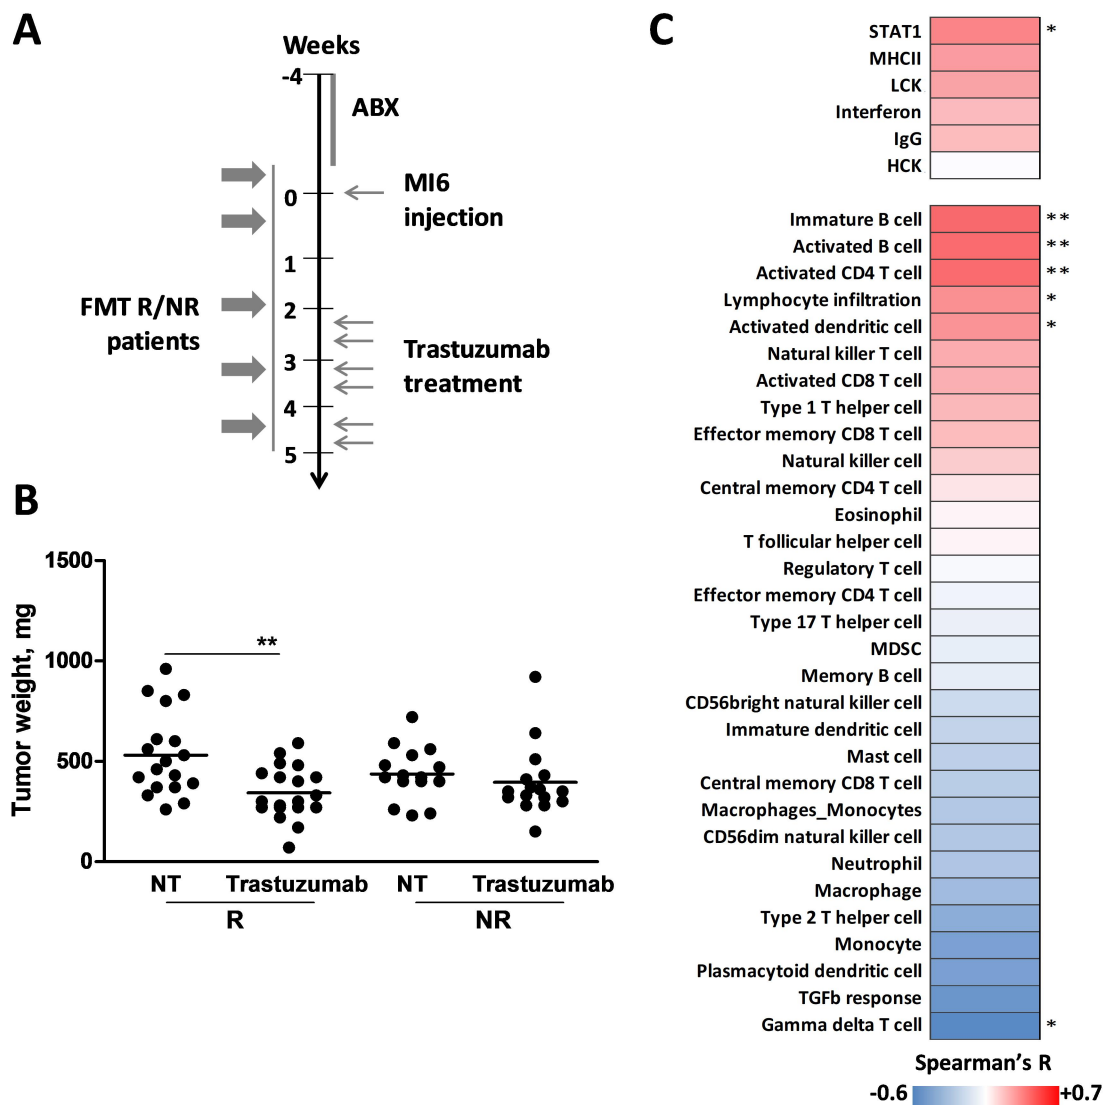

272 **Supplementary Fig. S11. Causal role of human commensal bacteria in immune-mediated**  
 273 **trastuzumab antitumor efficacy.** **A-B)** FVB mice were gavaged with fecal material from R (n=5) and  
 274 **NR (n=4) patients** after depletion of their intestinal flora by an antibiotic cocktail (ABX). MI6 cells  
 275 were injected into the mammary fat pads of treated mice. Fecal material from patients was transplanted  
 276 48 h before and after tumor cell injection and then every 10 days for a total of 5 FMTs (7-8  
 277 mice/patient were used). Treatment with trastuzumab was started when the tumors reached palpable  
 278 volumes. The mAb was administered twice a week for 3 weeks at a concentration of 5 mg/kg body  
 279 weight (A). The weight of tumors collected at the end of the experiment is reported (B). Differences in  
 280 tumor weights were evaluated by a mixed effect linear model, which calculated the significance of  
 281

282 differences between NT and T tumor weights considering the variability among patients and the  
283 variability in transplantation, using treatment in mice as a fixed effect and with a random intercept  
284 (\*\*p<0.01). C) Correlation between Rody immune metagenes (4) or infiltrating immune cell subsets  
285 (5) and PC1 values of  $\beta$ -diversity in profiled cases of HER2-positive BC cohort. The Spearman  
286 correlation coefficient (R) is color coded, and relative p-values are shown (\*p<0.05, \*\* p<0.01).

287

288

289

290 **3. Supplementary References**

291

292 1. Castagnoli L, Iezzi M, Ghedini GC, Ciravolo V, Marzano G, Lamolinara A, et al. Activated  
293 d16HER2 homodimers and Src kinase mediate optimal efficacy for trastuzumab. *Cancer Res*  
294 2014;74:6248-59.

295 2. Marchini C, Gabrielli F, Iezzi M, Zanobi S, Montani M, Pietrella L, et al. The human splice  
296 variant delta16HER2 induces rapid tumor onset in a reporter transgenic mouse. *PLoS ONE*  
297 2011;6:e18727.

298 3. Gargari G, Taverniti V, Balzaretto S, Ferrario C, Gardana C, Simonetti P, et al. Consumption of a  
299 *Bifidobacterium bifidum* Strain for 4 Weeks Modulates Dominant Intestinal Bacterial Taxa and  
300 Fecal Butyrate in Healthy Adults. *Appl Environ Microbiol* 2016;82:5850-9.

301 4. Rody A, Holtrich U, Pusztai L, Liedtke C, Gaetje R, Ruckhaeberle E, et al. T-cell metagene  
302 predicts a favorable prognosis in estrogen receptor-negative and HER2-positive breast cancers.  
303 *Breast Cancer Res* 2009;11:R15.

304 5. Charoentong P, Finotello F, Angelova M, Mayer C, Efremova M, Rieder D, et al. Pan-cancer  
305 Immunogenomic Analyses Reveal Genotype-Immunophenotype Relationships and Predictors of  
306 Response to Checkpoint Blockade. *Cell Rep* 2017;18:248-62.

307

308
